# Supplementary material for: Drug-Inclusive Inorganic–Organic Hybrid Systems for the Controlled Release of the Osteoporosis Drug Zoledronate
Source: MDPI journal article supplement (doi:10.3390/molecules27196212), 2022-09-21
Supplement: s1 [file s1]

**Supplementary Material**

**For**

**Drug-inclusive inorganic-organic hybrid systems for the controlled  
release of the osteoporosis drug zoledronate**

**By**

**Maria Vassaki, Savvina Lazarou, Petri Turhanen, Duane Choquesillo-  
Lazarte and Konstantinos D. Demadis**

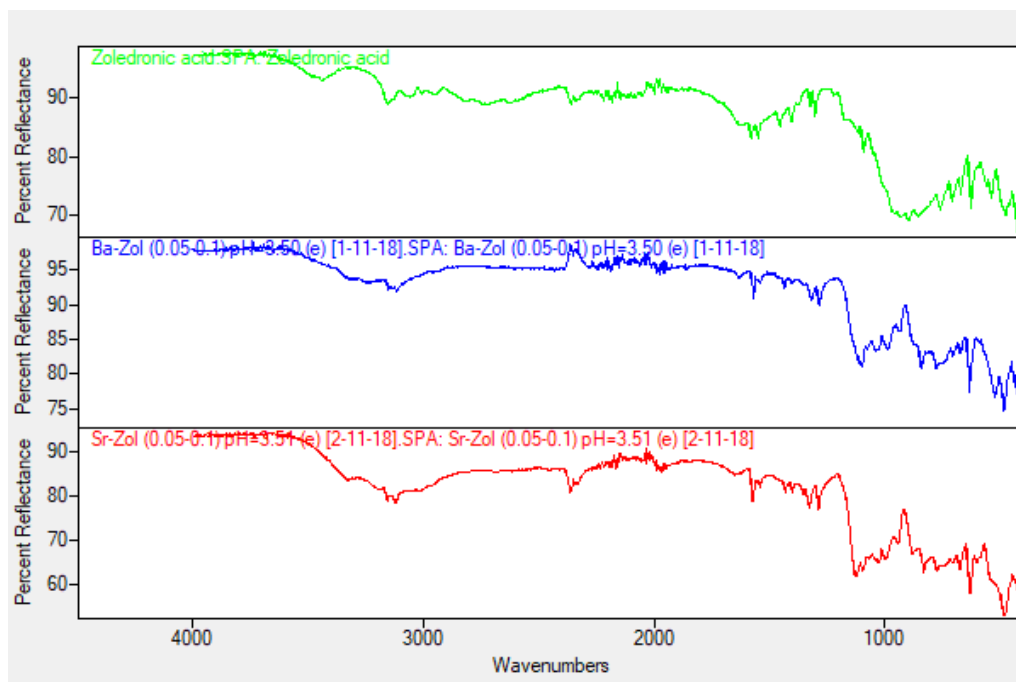

**Figure S1. ATR-IR spectra of zoledronic acid (green), Ba-ZOL (blue), and Sr-ZOL (red).**

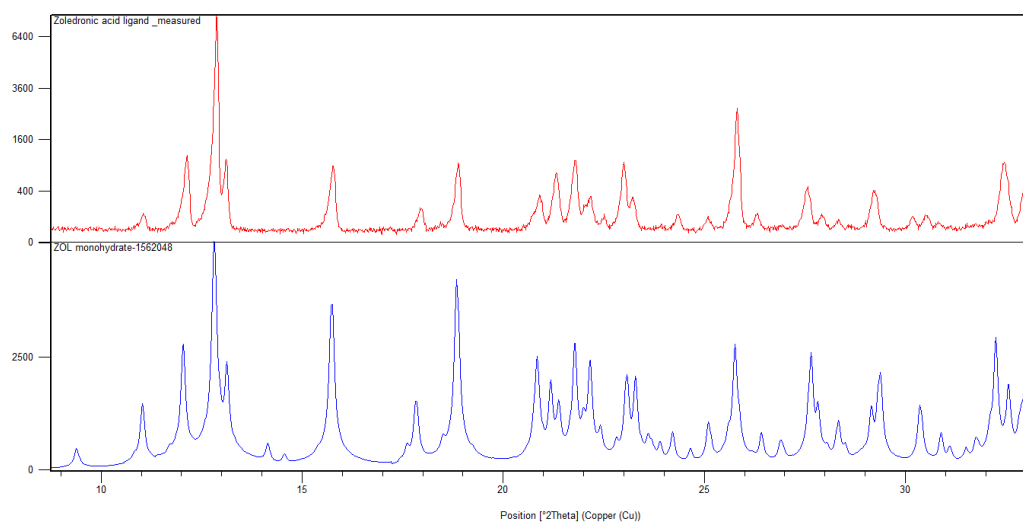

**Figure S2. Comparison of the calculated (lower, blue) and measured (upper, red) X-ray diffraction diagrams of zoledronic acid monohydrate.**

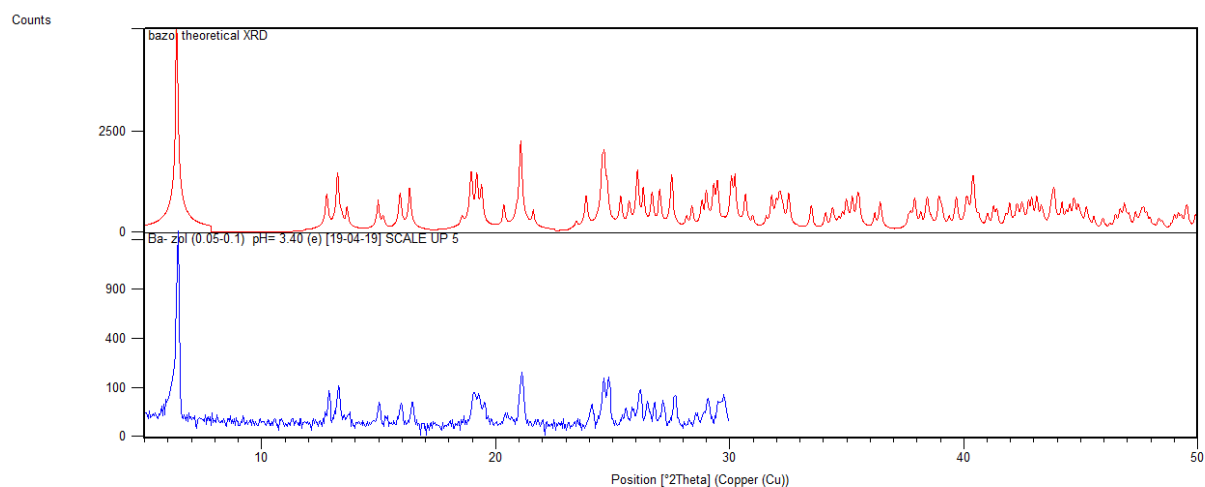

**Figure S3. Comparison of the calculated (upper, red) and measured (lower, blue) X-ray diffraction diagrams of Ba-ZOL.**

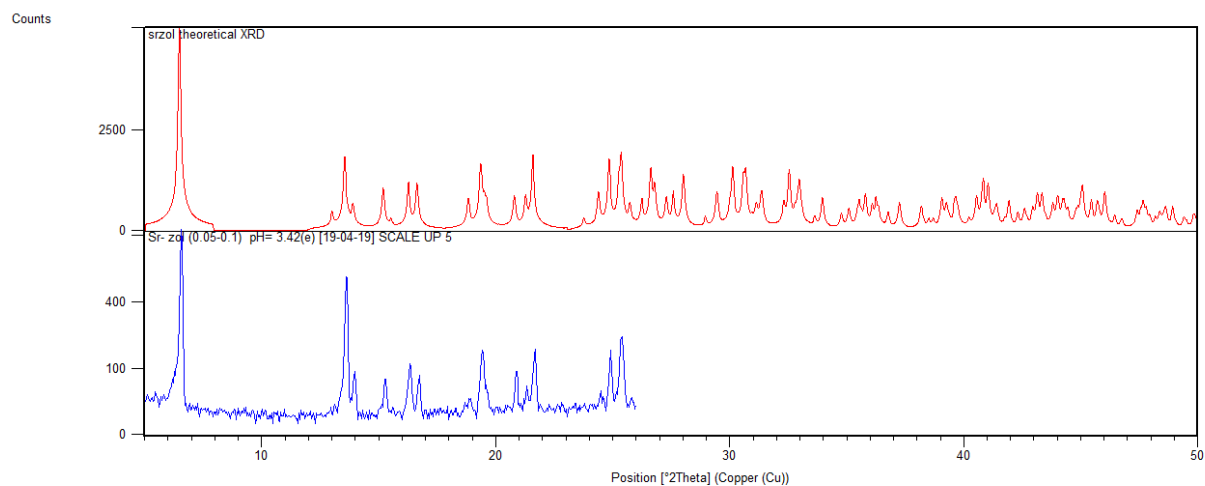

**Figure S4. Comparison of the calculated (upper, red) and measured (lower, blue) X-ray diffraction diagrams of Sr-ZOL.**

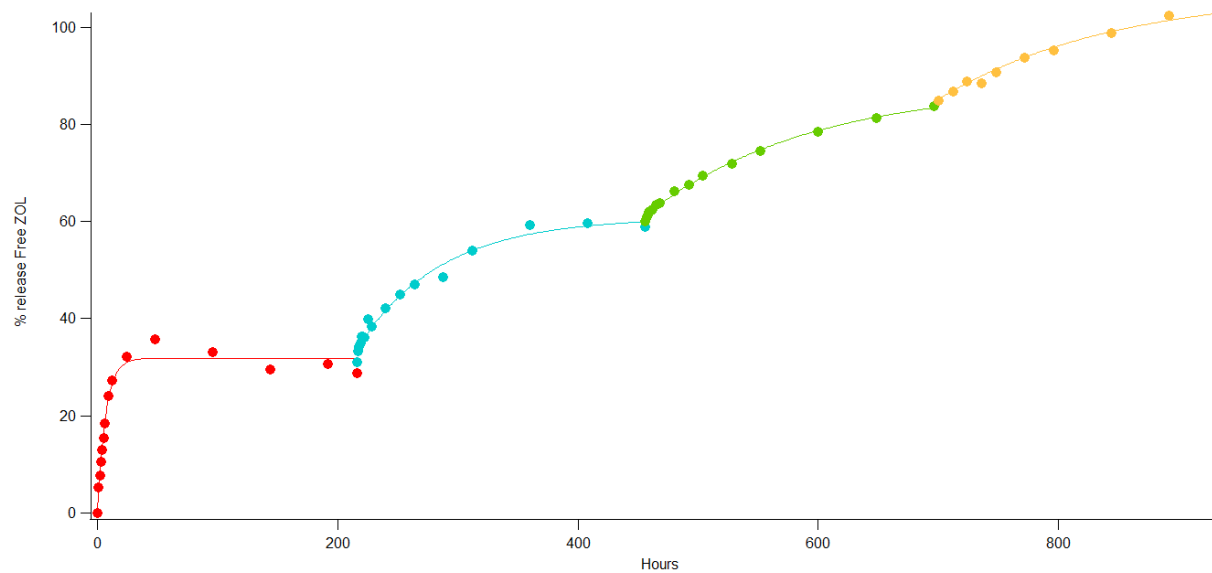

**Figure S5. Cumulative, step-wise release of ZOL from the “free” ZOL system.**

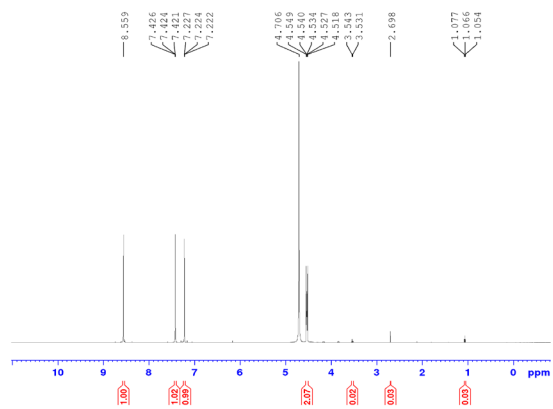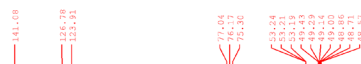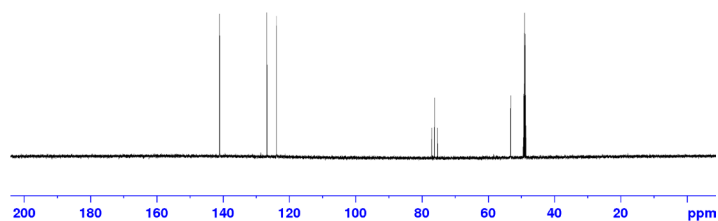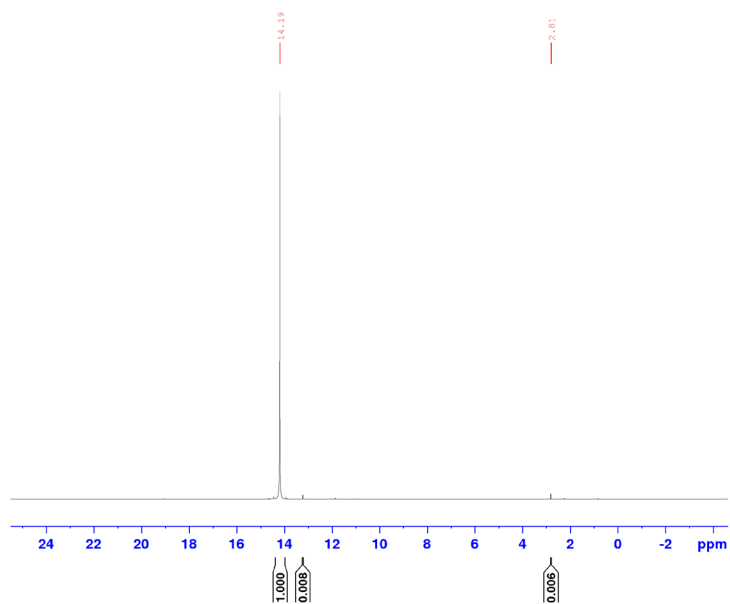

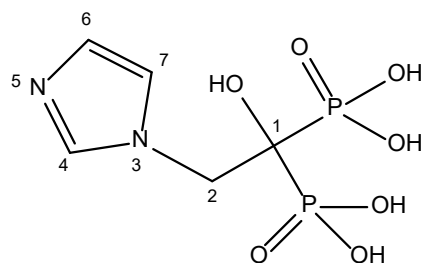

$^1\text{H}$  NMR ( $\text{D}_2\text{O}$ ):  $\delta$  7.70 (s, 1H, H-4), 7.21 (s, 1H, H-7), 6.84 (s, 1H, H-6), 4.44 (t, 2H, H-2,  $^3J_{\text{HP}} = 9.7$ ).  $^{13}\text{C}$  NMR ( $\text{D}_2\text{O}$ ,  $\text{CD}_3\text{OD}$  as ref.)  $\delta$  141.1 (C-4), 126.8 (C-7), 123.9 (C-6), 76.2 (t,  $^1J_{\text{CP}} = 131.5$ , P-C-P, C-1), 53.2 (t, C-2,  $^2J_{\text{CP}} = 3.4$ ).  $^{31}\text{P}$  NMR ( $\text{D}_2\text{O}$ )  $\delta$  16.4. NMR data were consistent to those reported in the literature [29].

**Figure S6.**  $^1\text{H}$  (upper),  $^{13}\text{C}$  (middle) and  $^{31}\text{P}$  (lower) NMR spectra of zoledronic acid monohydrate. Peak assignments are shown as well based on the numbered structural scheme.

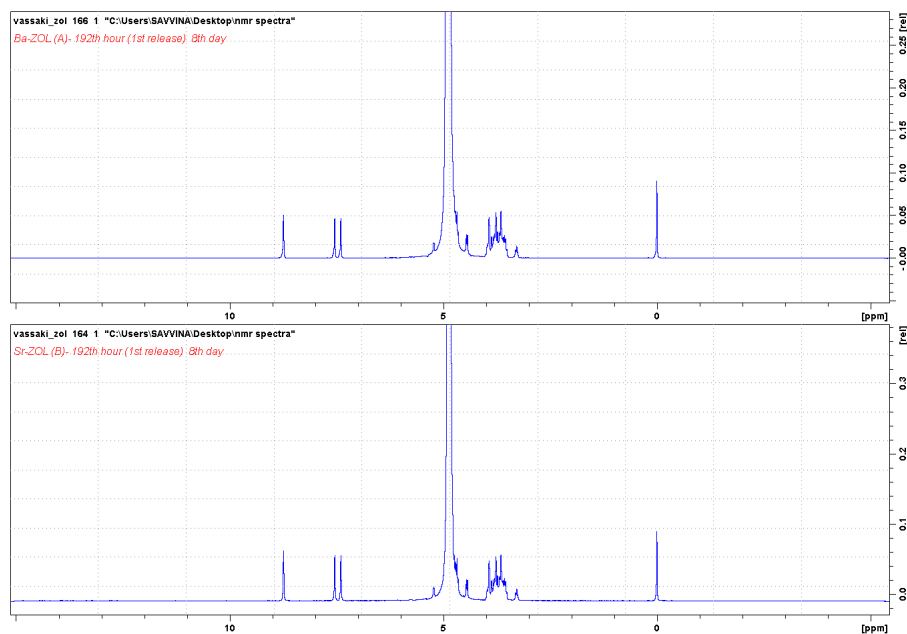

**Figure S7.**  $^1\text{H}$  NMR spectra of released zoledronic acid from the Ba-ZOL (above) and Sr-ZOL (below) systems.

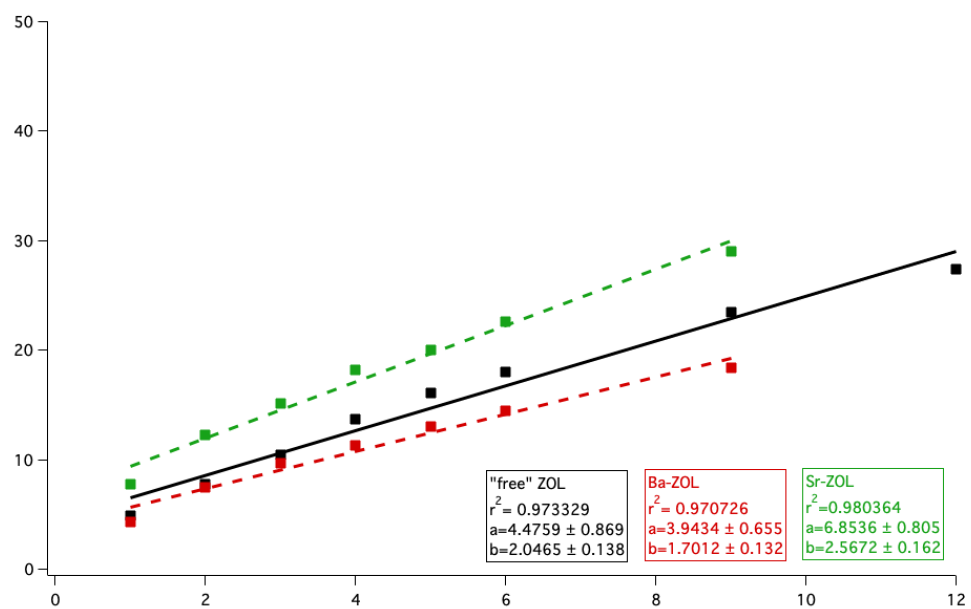

**Figure S8. Initial rates of drug release from “free” ZOL, Sr-ZOL and Ba-ZOL.**
